# Supplementary material
Source: PubMed Central journal article supplement (PMC7299782)

**Supplementary Table S1.** Detailed description of FRIDs evaluated in studies

|                                  | Source for FRID Ascertainment | CNS-Active                    |                 |               |                |                |              |                                     |         |                           | Cardiovascular   |                                |         |           |                           | Other          |                        |               |
|----------------------------------|-------------------------------|-------------------------------|-----------------|---------------|----------------|----------------|--------------|-------------------------------------|---------|---------------------------|------------------|--------------------------------|---------|-----------|---------------------------|----------------|------------------------|---------------|
|                                  |                               | Anticholinergics <sup>a</sup> | Antidepressants | Anti-dementia | Anti-Parkinson | Antipsychotics | Anti-seizure | Benzodiazepines/Sedatives/Hypnotics | Opioids | Skeletal muscle relaxants | Anti-arrhythmics | Antihypertensives <sup>b</sup> | Digoxin | Diuretics | Nitrates and Vasodilators | Alpha blockers | Beta blocker eye drops | Hypoglycemics |
| <b>OBSERVATIONAL STUDIES</b>     |                               |                               |                 |               |                |                |              |                                     |         |                           |                  |                                |         |           |                           |                |                        |               |
| <b>Bennett<sup>14</sup></b>      | Medical records               | x                             | x               |               |                | x              |              | x                                   | x       |                           | x                | x                              | x       |           | x                         |                | x                      | x             |
| <b>Benuza-Sola<sup>15</sup></b>  | Medical records               |                               | x               |               | x              | x              |              | x                                   | x       |                           | x                | x                              | x       | x         | x                         |                |                        |               |
| <b>Francis<sup>16</sup></b>      | Medical records               |                               | x               |               |                | x              | x            | x                                   |         |                           |                  |                                |         |           |                           |                |                        |               |
| <b>Hill-Taylor<sup>17</sup></b>  | Pharmacy claims               |                               |                 |               |                |                |              | x                                   |         |                           |                  |                                |         |           |                           |                |                        |               |
| <b>Kragh<sup>18,d</sup></b>      | National registry             | x                             | x               |               | x              | x              | x            | x                                   |         |                           | x                | x                              | x       | x         |                           |                |                        |               |
| <b>Marvin<sup>19</sup></b>       | Medical records               | x                             |                 |               |                | x              |              | x                                   | x       |                           |                  | x                              |         | x         | x                         |                |                        |               |
| <b>McMahon<sup>20</sup></b>      | Pharmacy claims               |                               | x               | x             |                | x              |              | x                                   |         |                           |                  |                                |         |           |                           |                |                        |               |
| <b>Sjöberg<sup>21</sup></b>      | National registry             | x                             | x               |               | x              | x              |              | x                                   | x       |                           | x                | x                              | x       | x         | x                         | x              |                        |               |
| <b>Trenaman<sup>22</sup></b>     | Pharmacy claims               |                               |                 |               |                | x              |              |                                     |         |                           |                  |                                |         |           |                           |                |                        |               |
| <b>Walsh<sup>23</sup></b>        | Medical records               |                               |                 |               |                | x              |              | x                                   |         |                           |                  |                                |         | x         |                           |                |                        |               |
| <b>INTERVENTION STUDIES</b>      |                               |                               |                 |               |                |                |              |                                     |         |                           |                  |                                |         |           |                           |                |                        |               |
| <b>Blalock<sup>24</sup></b>      | Pharmacy records              |                               | x               |               |                | x              | x            | x                                   | x       | x                         |                  |                                |         |           |                           |                |                        |               |
| <b>Boyé<sup>25</sup></b>         | Interview, GP, pharmacist     | x                             | x               |               | x              | x              | x            | x                                   | x       |                           | x                | x                              | x       | x         | x                         |                | x                      | x             |
| <b>Sjöberg<sup>26</sup></b>      | Medication list               |                               | x               |               | x              | x              |              | x                                   | x       |                           |                  | x                              |         | x         | x                         |                |                        |               |
| <b>van der Velde<sup>9</sup></b> | Interview, GP, pharmacist     | x                             | x               |               |                | x              |              | x                                   | x       |                           | x                | x                              | x       | x         | x                         | x              | x                      |               |

Abbreviations: ACE = angiotensin-converting enzyme; ARB = angiotensin II receptor blocker; CNS = central nervous system; FRID = fall-risk-increasing drug; GP = general practitioner; HMG-CoA = 3-hydroxy-3-methylglutaryl coenzyme A; NSAIDs = nonsteroidal anti-inflammatory drugs

<sup>a</sup>Anticholinergics include: antihistamines, antivertigo, urinary antispasmodics, and/or others not otherwise specified

<sup>b</sup>Antihypertensives include: ACE inhibitors/ARBs (and others acting on renin angiotensin system), beta blockers, calcium channel blockers, and others not otherwise specified

<sup>c</sup>"Others" within Other category include: steroids, NSAIDs, anti-gout, hydroquinine, adrenergics (respiratory), HMG-CoA reductase inhibitors

<sup>d</sup>Kragh: Noted cardiovascular medications, but did not specify individual classes (though excluded lipid-lowering medications)

**Supplementary Table S2.** Prevalence of FRID use at admission among observational studies

| Study                           | Overall FRID Use       | CNS-Active FRID Use                                                                                                                                            | Cardiovascular FRID Use                                                                                                                                                                                                              | Other FRID Use                                     |
|---------------------------------|------------------------|----------------------------------------------------------------------------------------------------------------------------------------------------------------|--------------------------------------------------------------------------------------------------------------------------------------------------------------------------------------------------------------------------------------|----------------------------------------------------|
| <b>Bennett<sup>14</sup></b>     | 2.5 ± 2.1 <sup>a</sup> | Anxiolytics 16.0%<br>Antidepressants 24.0%<br>Antipsychotics 3.0%<br>Opioids 21.0%<br>Anticholinergics 14.0%<br>Antihistamines 0.0%<br>Antivertigo 1.0%        | Antihypertensives 74.0%<br>Antiarrhythmics 3.0%<br>Vasodilators 7.0%<br>Digoxin 4.0%                                                                                                                                                 | Hypoglycemics 12.0%<br>Beta blocker eye drops 1.0% |
| <b>Benuza-Sola<sup>15</sup></b> | 91.3%                  | Opioids 4.4%<br>Anti-Parkinson 2.5%<br>Antipsychotics 5.4%<br>Anxiolytics 9.8%<br>Hypnotics and sedatives 8.5%<br>Antidepressants 15.0%                        | Cardiac glycosides 2.7%<br>Class IA antiarrhythmics 0.0%<br>Vasodilators 2.2%<br>Antihypertensives 0.1%<br>Diuretics 18.0%<br>Beta blockers 8.0%<br>Calcium channel blockers 5.7%<br>Agents acting on renin-angiotensin system 16.0% | Alpha adrenergic antagonists 1.9%                  |
| <b>Francis<sup>16</sup></b>     | N/A <sup>b</sup>       | N/A                                                                                                                                                            | N/A                                                                                                                                                                                                                                  | N/A                                                |
| <b>Marvin<sup>19</sup></b>      | 65.0%                  | Not available                                                                                                                                                  | Not available                                                                                                                                                                                                                        | Not available                                      |
| <b>Sjöberg<sup>21</sup></b>     | 93.0%                  | Antipsychotics 14.0%<br>Sedatives 51.0%<br>Benzodiazepines 31.0%<br>Antidepressants 40.0%<br>Urinary spasmolytics 3.0%<br>Anti-Parkinson 1.0%<br>Opioids 21.0% | Cardiovascular (overall) 62.0%<br>Digoxin 5.0%<br>Nitrates 11.0%<br>Type IA antiarrhythmics 0.0%<br>Diuretics 45.0%<br>Beta blockers 39.0%<br>Calcium channel blockers 17.0%<br>ACE inhibitors and ARBs 22.0%                        | Alpha blockers 5.0%<br>Beta blocker eye drops 5.0% |

Abbreviations: ACE = angiotensin-converting enzyme; ARB = angiotensin II receptor blocker; CNS = central nervous system; FRID = fall risk increasing drug; N/A = not applicable

<sup>a</sup>Average FRID count per participant reported, rather than percentage of participants on FRID at baseline

<sup>b</sup>This study only included subjects with potentially inappropriate medication use on admission

**Supplementary Table S3.** Risk of bias in observational studies<sup>a</sup>

| Study                     | Selection                                                                                                            |                                                  |                           |                                                                          | Comparability<br>Comparability of cohorts on the basis of the design or analysis | Outcome               |                                                              |                                  |
|---------------------------|----------------------------------------------------------------------------------------------------------------------|--------------------------------------------------|---------------------------|--------------------------------------------------------------------------|----------------------------------------------------------------------------------|-----------------------|--------------------------------------------------------------|----------------------------------|
|                           | Representativeness of the exposed cohort <sup>b</sup>                                                                | Selection of the non exposed cohort <sup>c</sup> | Ascertainment of exposure | Demonstration that outcome of interest was not present at start of study |                                                                                  | Assessment of outcome | Was follow-up long enough for outcomes to occur <sup>d</sup> | Adequacy of follow up of cohorts |
| Bennett <sup>14</sup>     | * Somewhat representative the average older adult admitted to emergency department or hospital for fall in Australia | N/A                                              | * Secure record           | N/A                                                                      | N/A                                                                              | * Record linkage      | No                                                           | N/A                              |
| Benuza-Sola <sup>15</sup> | * Somewhat representative of the average older adult in Spain admitted to hospital for fall-related fracture         | N/A                                              | * Secure record           | N/A                                                                      | N/A                                                                              | * Record linkage      | * Yes                                                        | N/A                              |
| Francis <sup>16</sup>     | * Somewhat representative the average older adult in Canada admitted to hospital for fall                            | N/A                                              | * Secure record           | N/A                                                                      | N/A                                                                              | * Record linkage      | No                                                           | N/A                              |
| Hill-Taylor <sup>17</sup> | * Somewhat representative of the average older adult in Canada with hospitalization for fall-related injury          | N/A                                              | * Secure record           | N/A                                                                      | N/A                                                                              | * Record linkage      | No                                                           | N/A                              |
| Kragh <sup>18</sup>       | * Truly representative of the average older adult with hip fracture in southern Sweden                               | N/A                                              | * Secure record           | N/A                                                                      | N/A                                                                              | * Record linkage      | No                                                           | N/A                              |

|                        |                                                                                                             |     |                 |     |     |                  |       |     |
|------------------------|-------------------------------------------------------------------------------------------------------------|-----|-----------------|-----|-----|------------------|-------|-----|
| Marvin <sup>19</sup>   | * Somewhat representative of the average older adult hospitalized for fall in United Kingdom                | N/A | * Secure record | N/A | N/A | * Record linkage | No    | N/A |
| McMahon <sup>20</sup>  | * Somewhat representative of the average older adult with emergency department visit for fall in Ireland    | N/A | * Secure record | N/A | N/A | * Record linkage | No    | N/A |
| Sjöberg <sup>21</sup>  | * Somewhat representative of the average older adult undergoing surgery for hip fracture in Sweden          | N/A | * Secure record | N/A | N/A | * Record linkage | * Yes | N/A |
| Trenaman <sup>22</sup> | * Somewhat representative of the average older adult in Canada with hospitalization for fall-related injury | N/A | * Secure record | N/A | N/A | * Record linkage | No    | N/A |
| Walsh <sup>23</sup>    | * Somewhat representative of the average older adult with fall, fracture, or syncope in Ireland             | N/A | * Secure record | N/A | N/A | * Record linkage | No    | N/A |

<sup>a</sup>Risk of bias was measured using the Newcastle-Ottawa scale.

<sup>b</sup> Studies can receive a point for being assessed as truly representative or somewhat representative of the population. We were conservative and rated studies as "somewhat representative" if they did not assess the entire population.

<sup>c</sup> Studies did not include a control group of people without a fall-related injury.

<sup>d</sup> Studies were given a point (star) if the method of outcome assessment was able to capture a change in FRID use at a specific time point following discharge (rather than looking at change in use at discharge or within a period of time following discharge).

**Supplementary Table S4.** Risk of bias in intervention studies<sup>a</sup>

| <b>Study</b>                 | <b>Random sequence generation</b> | <b>Allocation concealment</b> | <b>Blinding: participants and personnel</b> | <b>Blinding: outcome assessment</b> | <b>Incomplete outcome data</b> | <b>Selective reporting</b> |
|------------------------------|-----------------------------------|-------------------------------|---------------------------------------------|-------------------------------------|--------------------------------|----------------------------|
| Blalock <sup>24</sup>        | Low                               | Low                           | Unclear                                     | Low                                 | High                           | Low                        |
| Boyé <sup>25</sup>           | Unclear                           | Unclear                       | Unclear                                     | Low                                 | High                           | Low                        |
| Sjöberg <sup>26</sup>        | Low                               | Low                           | Unclear                                     | Unclear                             | Unclear                        | Low                        |
| van der Velde <sup>9,b</sup> | High                              | High                          | High                                        | Low                                 | Unclear                        | Low                        |

<sup>a</sup>Risk of bias was measured using the Cochrane Risk of Bias tool.

<sup>b</sup>The study by van der Velde et al. was not a randomized controlled trial, but for consistency, its risk of bias was analyzed using the same Cochrane tool used for the randomized controlled trials.

**Supplementary Figure S1.** Summary of intervention studies and main results

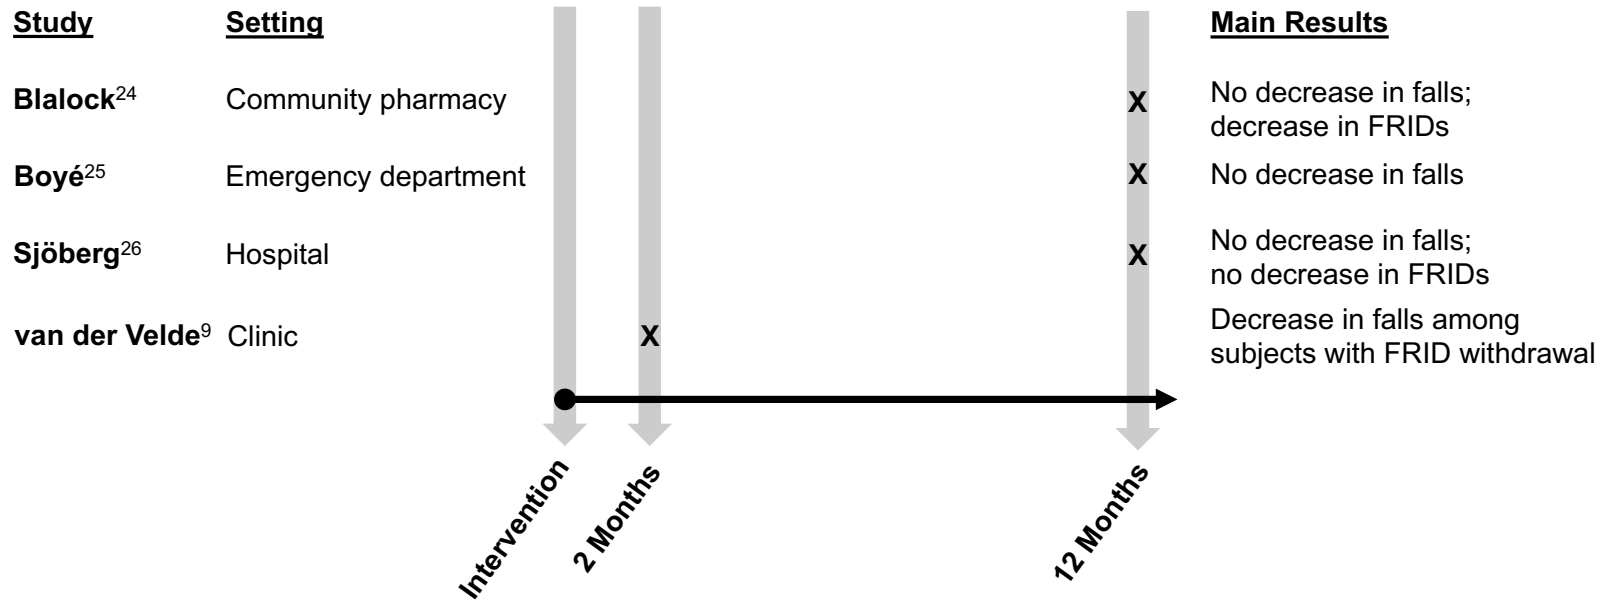

Supplement: NIHMS1584453-supplement-Supplementary_Material.pdf [file NIHMS1584453-supplement-Supplementary_Material.pdf]
